# Supplementary material for: Musical Agency during Physical Exercise Decreases Pain
Source: Front Psychol. 2018 Jan 17;8:2312. doi: 10.3389/fpsyg.2017.02312 (PMC5776142; doi:10.3389/fpsyg.2017.02312)
Supplement: Supplementary file 1 [file Table1.DOC]

**RUNNING TITLE: Hypoalgesic effects of music**

**TITLE: Musical agency during physical exercise decreases pain**

**AUTHORS:** Fritz, Thomas Hans* 1,2,3,Bowling, Daniel Liu4, Contier, Oliver1, Grant, Joshua1, Schneider, Lydia1, Lederer, Annette1, Höer, Felicia1, Busch, Eric1, Villringer, Arno1.

**AFFILIATIONS:**

1Max Planck Institute for Human Cognitive and Brain Sciences, Stephanstrasse 1A, 04103 Leipzig, Germany, 2Department of Nuclear Medicine University of Leipzig, Liebigstrasse 18,  04103 Leipzig, Germany,3Institute for Psychoacoustics and Electronic Music (IPEM), Blandijnberg 2, B-9000 Ghent, Belgium, 4Department of Cognitive Biology, University of Vienna, Althanstrasse 14, 1090 Vienna

*Corresponding author: [fritz@cbs.mpg.de](mailto:fritz@cbs.mpg.de), Stephanstrasse 1A, 04103, Leipzig, Germany

| *Supplementary Table 1.: PSQ-minor scores and pain tolerance [s] of participants in the two experimental conditions* | | | | |
| --- | --- | --- | --- | --- |
|  | |  | *Pain tolerance* | |
|  | | *PSQ-minor* | *Musical agency* | *Passive listening* |
| Participant number | 1 | 3,57 | 42,24 | 37,45 |
| 2 | 3,14 | 56,46 | 40,44 |
| 3 | 2,14 | 102,33 | 95,40 |
| 4 | 4,00 | 37,78 | 43,19 |
| 5 | 2,29 | 72,32 | 92,65 |
| 6 | 1,43 | 55,16 | 34,70 |
| 7 | 1,71 | 39,13 | 17,80 |
| 8 | 1,57 | 37,50 | 36,13 |
| 9 | 4,14 | 24,85 | 31,10 |
| 10 | 2,14 | 71,79 | 65,96 |
| 11 | 3,00 | 55,51 | 43,40 |
| 12 | 2,29 | 39,11 | 27,74 |
| 13 | 2,86 | 19,56 | 22,56 |
| 14 | 3,00 | 31,02 | 24,24 |
| 15 | 2,71 | 41,63 | 44,51 |
| 16 | 4,71 | 33,56 | 37,04 |
| 17 | 1,57 | 106,53 | 79,76 |
| 18 | 1,14 | 72,55 | 68,49 |
| 19 | 4,14 | 12,05 | 14,36 |
